# Supplementary material
Source: publisher figshare collection journal article supplement (https://sage.figshare.com/ndownloader/files/16321118)
Supplement: Supplementary file 1 [file 16321118]

**Figure S1.** Multivariate-adjusted carotid intima-media thickness (IMT) across the adult lifespan in cases with non-cardiac arterial vascular events (stroke and critical limb ischemia [CLI]) and age, sex-and ethnicity-matched randomly selected controls from a community sample in Africa. Data shown are multivariate adjusted means and SEM. Adjustments are for sex, hypertension, diabetes mellitus, and smoking. \* $p < 0.05$ , \*\* $p < 0.005$ , \*\*\* $p < 0.0001$  vs controls.

**Figure S2.** Prevalence of an increased carotid intima-media thickness (IMT) across the adult lifespan in cases with non-cardiac arterial vascular events (stroke and critical limb ischemia [CLI]) and age, sex-and ethnicity-matched randomly selected controls from a community sample in Africa. Upper panels show prevalence rates for thresholds  $>95\%$  confidence intervals for age and lower panels for thresholds  $>0.80$  mm at any age. \* $p < 0.05$ , \*\* $p < 0.001$ , \*\*\* $p < 0.0001$  vs controls.

**Figure S3.** Multivariate adjusted odds (Odds ratio [OR] and 95% confidence interval [CI]) of a non-cardiac arterial vascular event (stroke or critical limb ischemia) across the adult lifespan with the presence of carotid plaque (open circles) or an increased carotid intima-media thickness (IMT) (closed circles) in Africa. Adjustments are for hypertension, diabetes mellitus, and smoking. An increased IMT was defined as values above 0.80 mm.

**Figure S4.** Impact of the addition of an increased carotid intima-media thickness (IMT) and carotid plaque to receiver operator characteristic (ROC) curves for the detection of critical limb ischemia or stroke at an age less than (upper panel) or more than (lower panel) 50 years of age. An increased IMT was defined as values above the 95<sup>th</sup> percentile for age in the community. Curves are for the presence of plaque or an increased IMT considered separately or for either the presence of plaque or an increased IMT considered together. \* $p < 0.005$ ; \*\* $p < 0.0001$  vs the presence of plaque or an increases IMT considered together.

Figure S1.

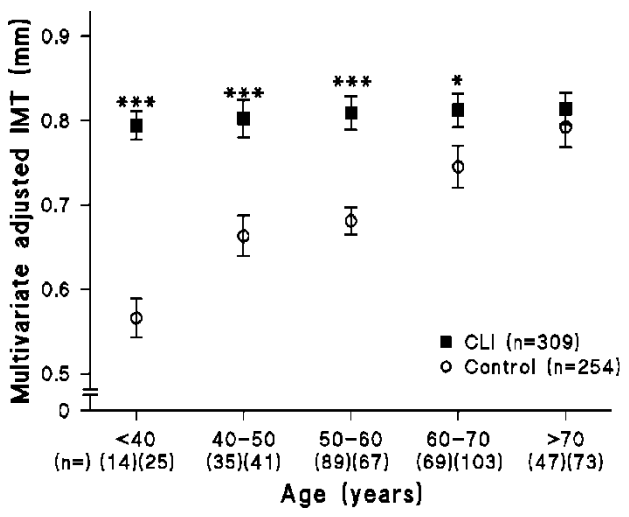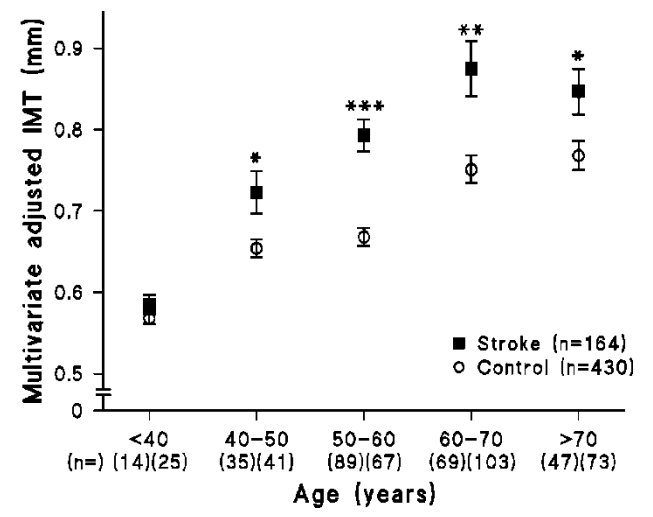

Figure S2.

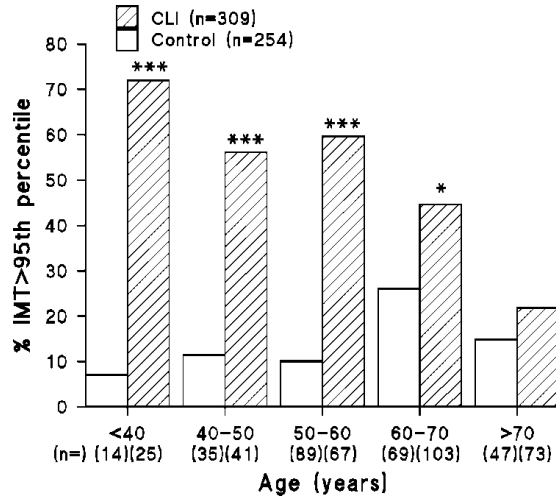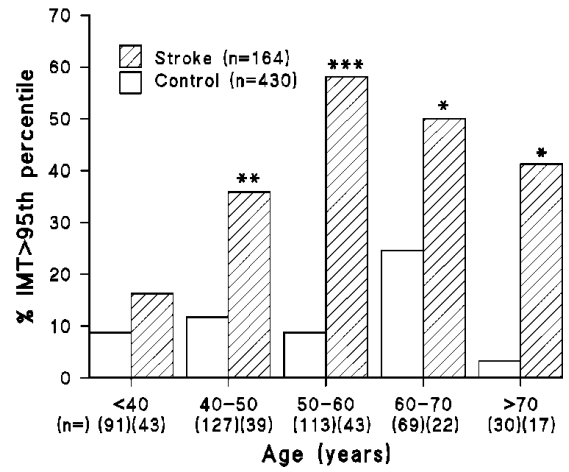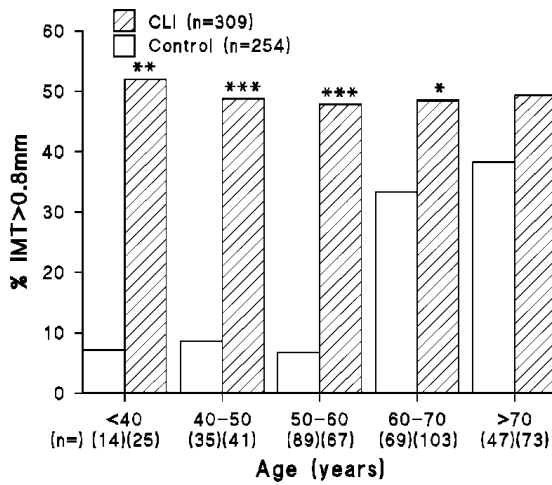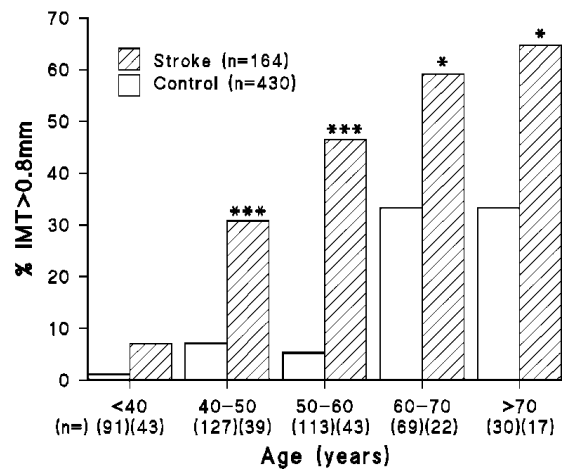

Figure S3.

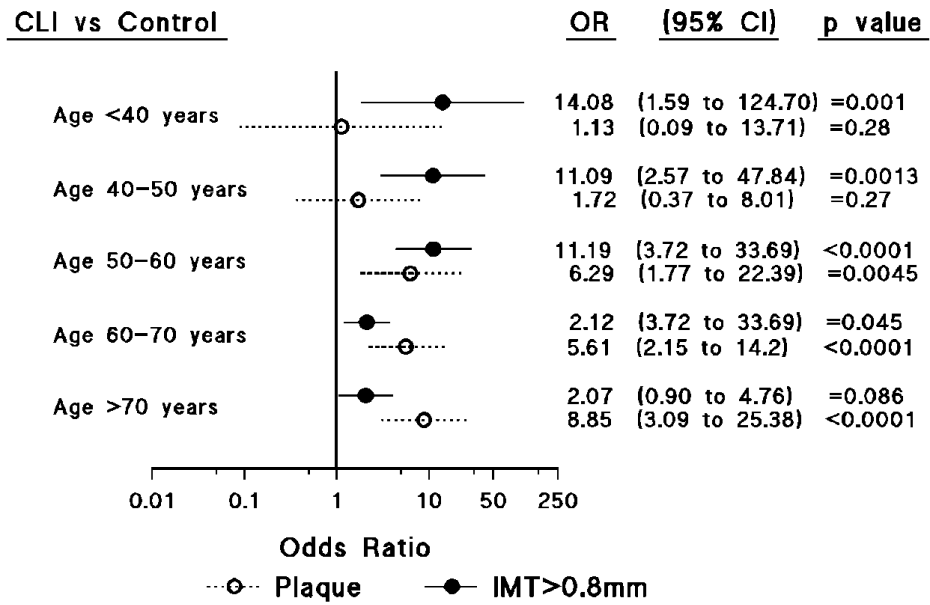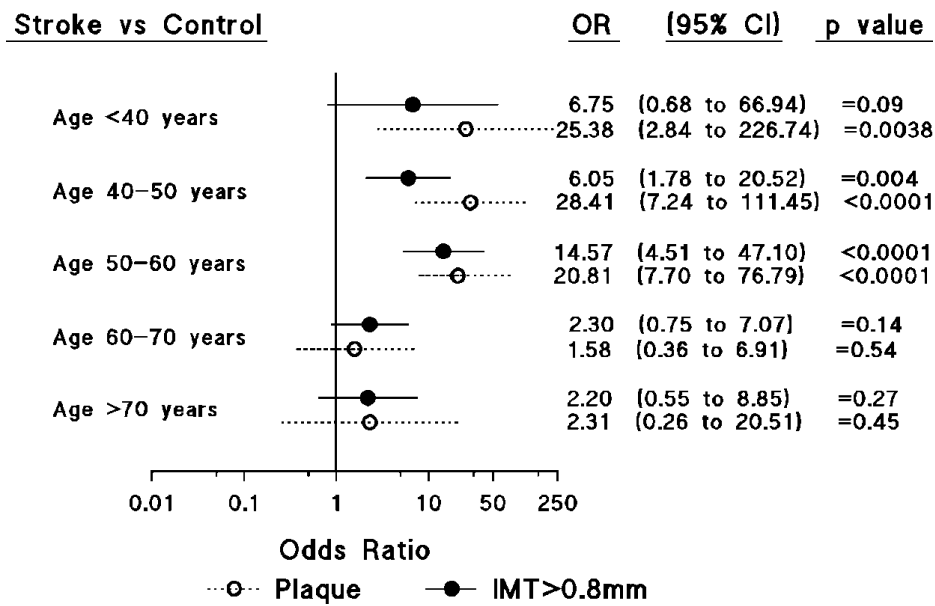

Figure S4.

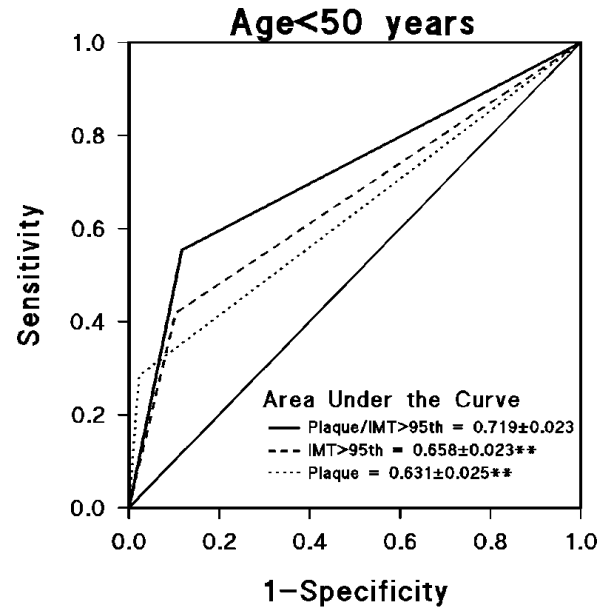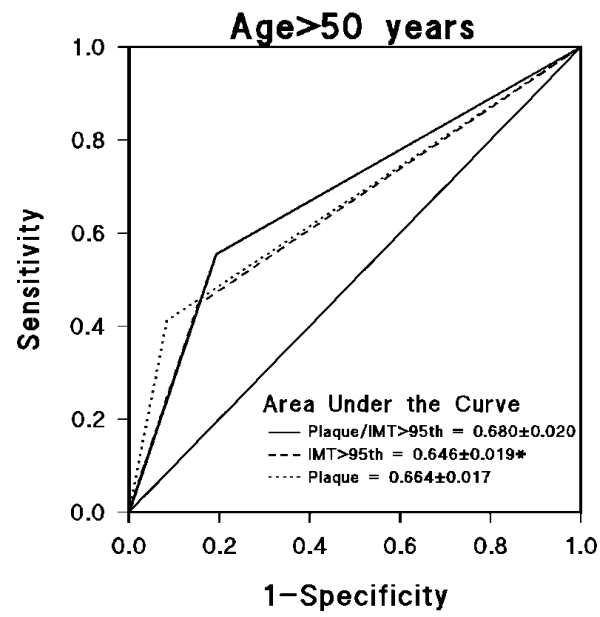

**Table S1.** Characteristics of participants with critical limb ischemia with histological assessment of arterial tree of amputated limbs (n=54).

---

|                                      |                 |
|--------------------------------------|-----------------|
| Age (years)                          | 62.0±14.6       |
| Sex (% male)                         | 74.1            |
| Body mass index (kg/m <sup>2</sup> ) | 24.4±4.7*       |
| % Hypertensive                       | 57.4            |
| % Diabetes mellitus                  | 25.9            |
| % Regular smoking                    | 35.2            |
| SBP/DBP (mm Hg)                      | 127±21/77**±12* |
| Total cholesterol (mmol/l)           | 3.67±1.35       |
| LDL cholesterol (mmol/l)             | 1.90±0.88       |
| HDL cholesterol (mmol/l)             | 0.83±0.42**     |
| Glycated hemoglobin (%)              | 7.26±2.69       |

---

Data shown are proportions, mean±SD. CLI, critical limb ischemia; SBP, systolic blood pressure; DBP, diastolic blood pressure; LDL, low density lipoprotein; HDL, high density lipoprotein. \*p<0.05; \*\*p<0.005 vs all CLI.

**Table S2.** Age adjusted carotid intima-media thickness (IMT) and plaque in different stroke subtypes based on the TOAST classification.

|                           | IMT (mm)    | Plaque (%) |
|---------------------------|-------------|------------|
| Hemorrhagic (n=18)        | 0.796±0.034 | 44.4       |
| Atherosclerotic (n=9)     | 0.750±0.048 | 33.3       |
| Small vessel (n=29)       | 0.773±0.027 | 55.2       |
| Cardio-embolic (n=31)     | 0.750±0.026 | 48.4       |
| Other determinants (n=13) | 0.717±0.043 | 23.1       |
| Indeterminate (n=64)      | 0.772±0.018 | 37.5       |
